# Supplementary material for: NICS values scan in three-dimensional space of the hoop-shaped π-conjugated molecules [6]8cyclacene and [16]trannulene
Source: Royal Society of Chemistry journal article supplement (doi:10.1039/c7nj04110a), 2017-12-29
Supplement: c7nj04110a1.pdf [file c7nj04110a1.pdf]

## Supporting Information

### The NICS Values Scan in Three-dimensional Space of the hoop-shaped $\pi$ -conjugated molecules:

#### [6]<sub>8</sub>cyclacene and [16]trannulene

Qing Li,<sup>a,b</sup>Hong-Liang Xu<sup>a\*</sup> and Zhong-Min Su<sup>a,b,\*</sup>

<sup>a</sup>*Institute of Functional Material Chemistry, Faculty of Chemistry, Northeast Normal University, Changchun, Jilin 130024, China.*

<sup>b</sup>*Department of Chemistry, Faculty of Science, Yanbian University, Yanji, Jilin, 133002, China.*

### Contents

1. The ACID of [10]trannulene (Figure. S1)
2. The ACID of [12]trannulene (Figure. S2)
3. The ACID of [14]trannulene (Figure. S3)
4. The ACID of [20]trannulene (Figure. S4)
5. The ACID of [6]<sub>5</sub>cyclacene (Figure. S5)
6. The ACID of [6]<sub>6</sub>cyclacene (Figure. S6)
7. The ACID of [6]<sub>7</sub>cyclacene (Figure. S7)
8. The ACID of [6]<sub>10</sub>cyclacene (Figure. S8)
9. The planar NICS values scan of **P(L=0.2)** for [6]<sub>8</sub>cyclacene (Figure. S9)
10. The planar NICS values scan of **P(L=0.6)** for [6]<sub>8</sub>cyclacene (Figure. S10)
11. The planar NICS values scan of **P(L=0.8)** for [6]<sub>8</sub>cyclacene (Figure. S11)
12. The planar NICS values scan of **P(L=1.2)** for [6]<sub>8</sub>cyclacene (Figure. S12)
13. The planar NICS values scan of **P(L=1.4)** for [6]<sub>8</sub>cyclacene (Figure. S13)
14. The planar NICS values scan of **P(L=1.6)** for [6]<sub>8</sub>cyclacene (Figure. S14)
15. The planar NICS values scan of **P(L=2.4)** for [6]<sub>8</sub>cyclacene (Figure. S15)
16. The planar NICS values scan of **P(L=2.6)** for [6]<sub>8</sub>cyclacene (Figure. S16)
17. The planar NICS values scan of **P(L=2.8)** for [6]<sub>8</sub>cyclacene (Figure. S17)
18. The planar NICS values scan of **P(L=3.0)** for [6]<sub>8</sub>cyclacene (Figure. S18)

19. The situation between the internal magnetic field during the course of two [16]trannulenes stacked into [6]<sub>8</sub>cyclacene.

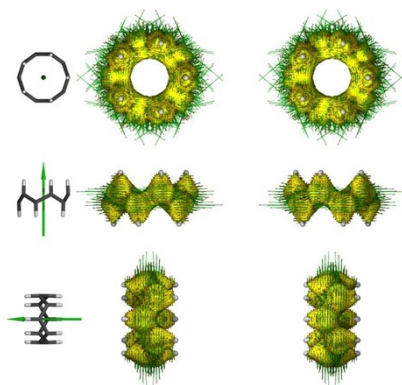

**Figure S1.** The ACID of [10]trannulene.

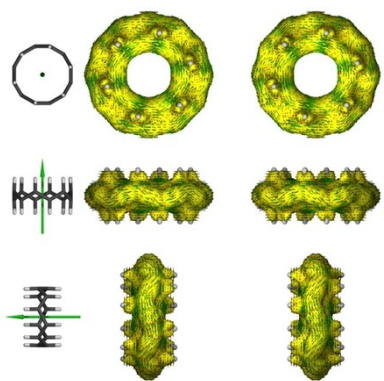

**Figure S2.** The ACID of [12]trannulene.

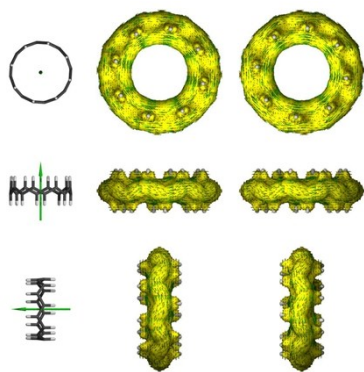

**Figure S3.** The ACID of [14]trannulene.

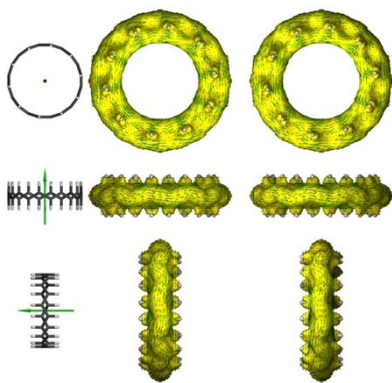

**Figure S4.** The ACID of [20]trannulene.

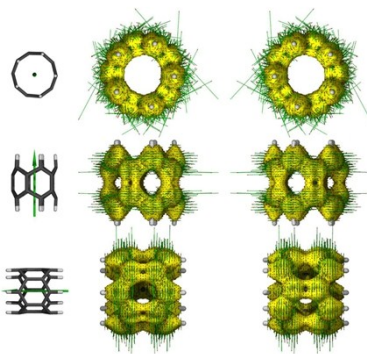

**Figure S5.** The ACID of [6]<sub>5</sub>cyclacene.

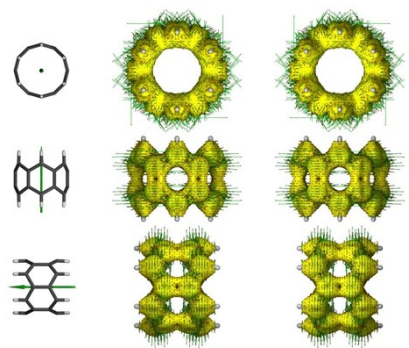

**Figure S6.** The ACID of [6]<sub>6</sub>cyclacene.

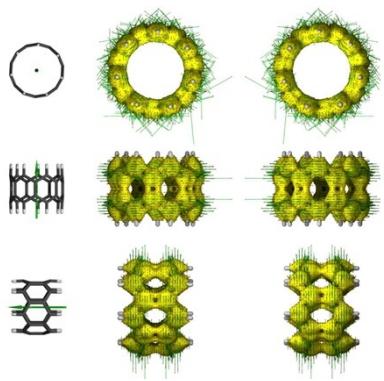

**Figure S7.** The ACID of [6]cyclacene.



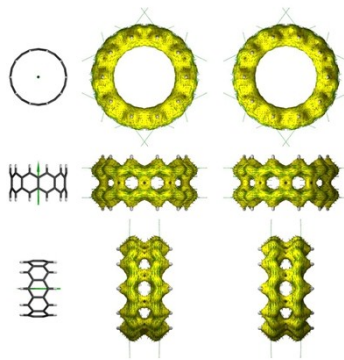

**Figure S8.** The ACID of [6]<sub>10</sub>cyclacene.

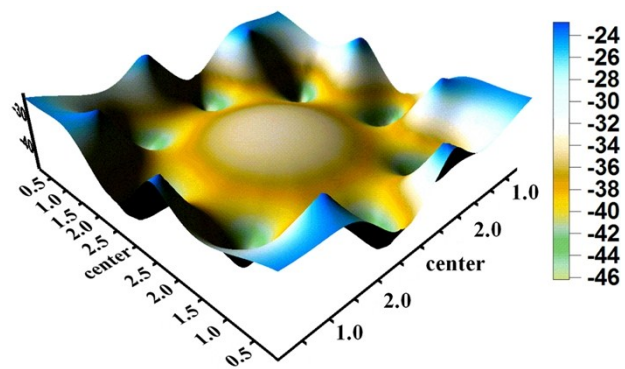

**Figure S9.** The planar NICS values scan of  $P(L=0.2)$  for  $[6]_8$ cycloacene.

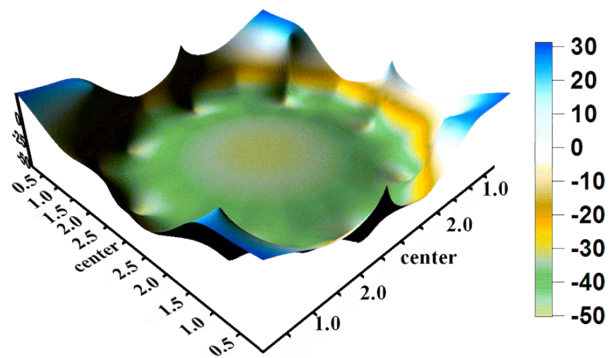

**Figure S10.** The planar NICS values scan of  $P(L=0.6)$  for  $[6]_8$ cycloacene.

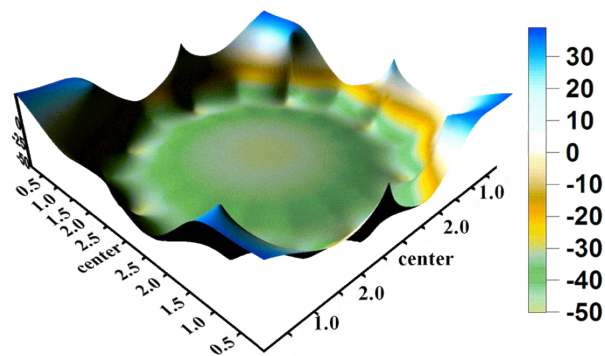

**Figure S11.** The planar NICS values scan of  $P(L=0.8)$  for  $[6]_8$ cycloacene.

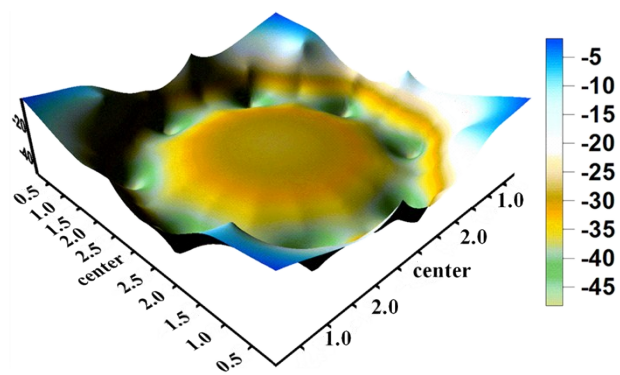

**Figure S12.** The planar NICS values scan of  $P(L=1.2)$  for  $[6]_8$ cyclacene.

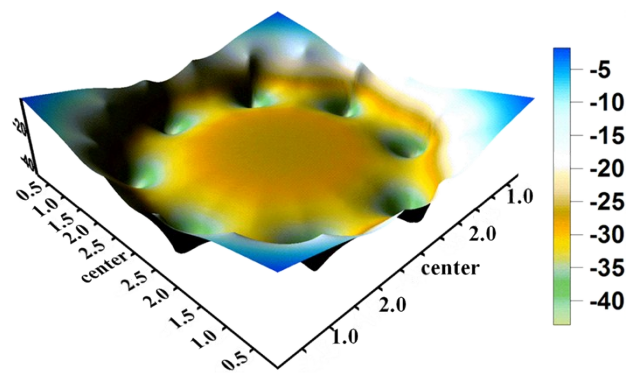

**Figure S13.** The planar NICS values scan of  $P(L=1.4)$  for  $[6]_8$ cycloacene.

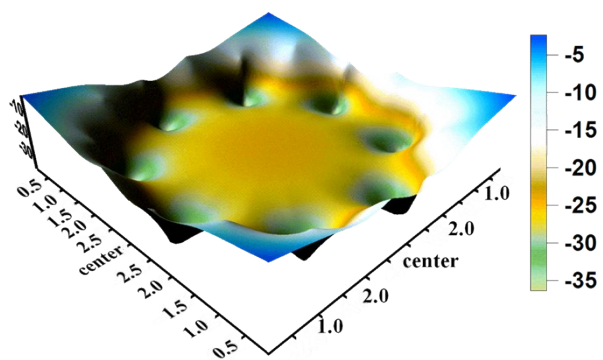

**Figure S14.** The planar NICS values scan of  $P(L=1.6)$  for  $[6]_8$ cycloacene.

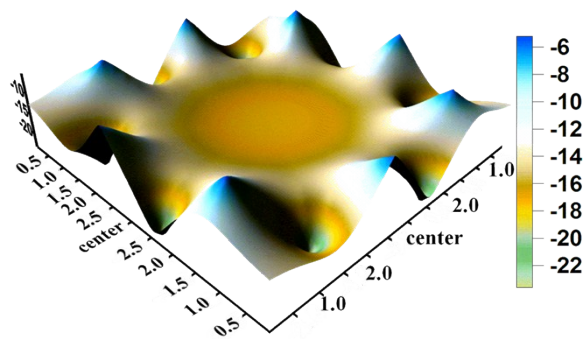

**Figure S15.** The planar NICS values scan of  $P(L=2.4)$  for  $[6]_3$ cycloclacene.



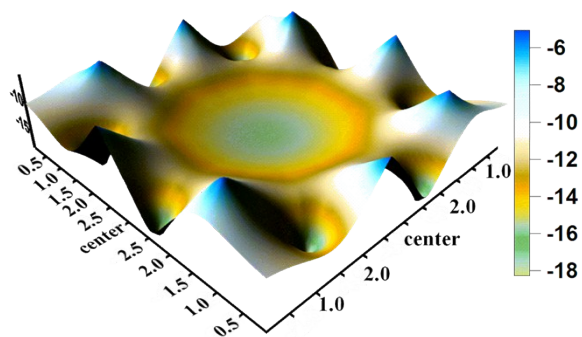

**Figure S16.** The planar NICS values scan of  $P(L=2.6)$  for  $[6]_3$ cycloacene.

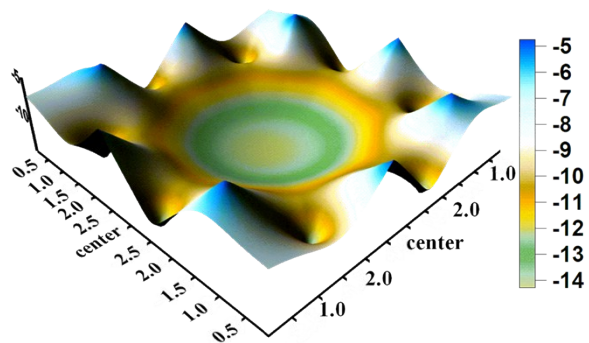

**Figure S17.** The planar NICS values scan of  $P(L=2.8)$  for  $[6]_8$ cyclacene.

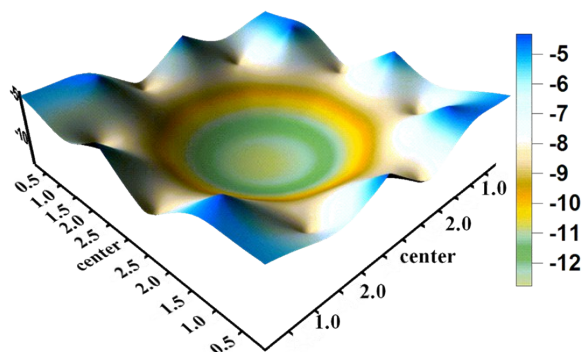

**Figure S18.** The planar NICS values scan of  $P(L=3.0)$  for  $[6]_8$ cyclacene.

**The situation between the internal magnetic field during the course of two  $[16]$ trannulenes stacked into  $[6]_8$ cyclacene.**

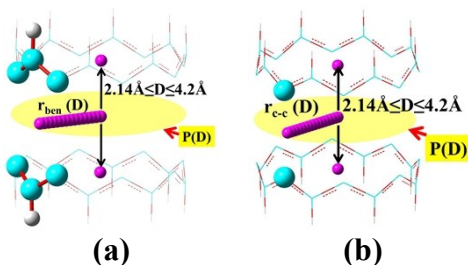

**Figure S19.** The diagram for the NICS values scan about the center cross-section  $P(D=2.14\sim 4.20\text{Å})$  in the stack process.

In order to explicitly describe the situation between the internal magnetic field during the course of two  $[16]$ trannulenes stacked into  $[6]_8$ cyclacene. We simulated the change of the center cross-section internal magnetic field in the stack process by the NICS values scan method. Firstly, the center cross-section is defined as  $P(D=2.14\sim 4.20\text{Å})$ , in which  $D$  ( $2.14\sim 4.20\text{Å}$ ) is defined as the distance of two  $[16]$ trannulenes in the stack process (Figure S19). On the other hand, the two kinds radius ( $r_{\text{ben}}(D=2.14\sim 4.20\text{Å})$  and  $r_{\text{c-c}}(D=2.14\sim 4.20\text{Å})$ ) in center cross-section are listed in Figure S19. The distance from the center of the six-member ring to the center of the cross-section is represented by the  $r_{\text{ben}}(D=2.14\sim 4.20\text{Å})$ , and the distance from the center of the C-C bond to the center of the cross-section is represented by the  $r_{\text{c-c}}(D=2.14\sim 4.20\text{Å})$ .

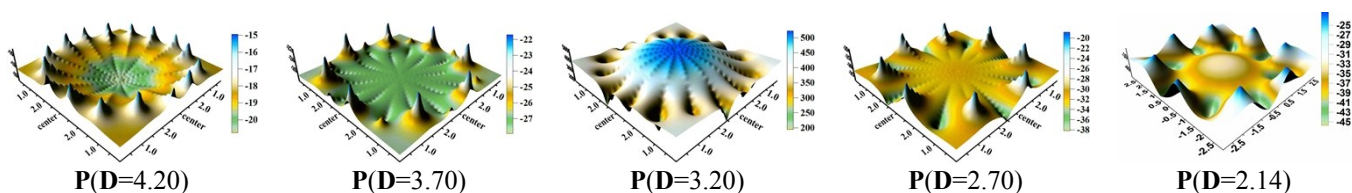

**Figure S20.** The NICS scan in the cross-section  $P(D=2.14\sim 4.20\text{Å})$ .

Figure S20 lists the typical schematic diagram of the NICS values scan in the center cross-section  $\mathbf{P}(\mathbf{D}=2.14\sim 4.20)$  based on the results of the NICS values scan in the  $\mathbf{r}_{\text{ben}}(\mathbf{D}=2.14\sim 4.20)$  and  $\mathbf{r}_{\text{c-c}}(\mathbf{D}=2.14\sim 4.20)$ . There is a significant difference of the internal magnetic field with one [16]trannulenes closed to another [16]trannulenes. When  $\mathbf{D}>3.2\text{\AA}$ , there is a induced aromaticity due to the influence of two [16]trannulenes, and the aromaticity is enhancing with the  $\mathbf{D}$  decreasing. However, when  $\mathbf{D}\approx 3.2\text{\AA}$ , the drastic anti-aromaticity has existed between two [16]trannulenes. With the formation of [6]<sub>8</sub>cyclacene, the obvious aromaticity has been appeared gradually.
